# Supplementary material
Source: Springer Nature journal article supplement (https://www.springermedizin.de/resource/supplementary/13058_2013_3420_MOESM10_ESM.pdf/9704130)
Supplement: MOESM10 [file 9704130]

**Additional file 10:** Most significantly upregulated and downregulated genes in hAMSCs in *ex vivo* co-cultures

| Gene_ID   | logFC_CCS-MCS | pVal_CCS-MCS | Description                                                                         |
|-----------|---------------|--------------|-------------------------------------------------------------------------------------|
| MMP13     | 4.640723      | 0.000125     | matrix metalloproteinase 13 (collagenase 3)                                         |
| INHBA     | 3.091423      | 0.001351     | inhibin, beta A                                                                     |
| COL11A1   | 2.929676      | 9.45E-09     | collagen, type XI, alpha 1                                                          |
| LOC401097 | 2.892429      | 8.73E-06     | Similar to LOC166075                                                                |
| ENPP1     | 2.656819      | 8.06E-05     | ectonucleotide pyrophosphatase/phosphodiesterase 1                                  |
| SULF1     | 2.552532      | 0.000158     | sulfatase 1                                                                         |
| ANGPT1    | 2.460727      | 7.78E-06     | angiopoietin 1                                                                      |
| FBXO32    | 2.344134      | 0.001208     | F-box protein 32                                                                    |
| EPYC      | 2.319811      | 0.0001       | epiphycan                                                                           |
| TNFSF4    | 2.278077      | 0.000125     | tumor necrosis factor (ligand) superfamily, member 4                                |
| ITGA11    | 2.131321      | 1.40E-06     | integrin, alpha 11                                                                  |
| NUAK1     | 2.041484      | 9.88E-08     | NUAK family, SNF1-like kinase, 1                                                    |
| GALNT13   | 2.039363      | 0.000797     | UDP-N-acetyl-alpha-D-galactosamine:polypeptide N-acetylgalactosaminyltransferase 13 |
| DACT1     | 1.845281      | 0.000225     | dapper, antagonist of beta-catenin, homolog 1 (Xenopus laevis)                      |

|          |          |          |                                           |
|----------|----------|----------|-------------------------------------------|
| MNS1     | 1.658473 | 0.000297 | meiosis-specific nuclear structural 1     |
| CCL11    | 1.556619 | 9.44E-06 | chemokine (C-C motif) ligand 11           |
| SLC38A1  | 1.530776 | 0.001437 | solute carrier family 38, member 1        |
| TPM1     | 1.391483 | 1.81E-05 | tropomyosin 1 (alpha)                     |
| FLJ33996 | 1.391243 | 0.000293 | hypothetical protein FLJ33996             |
| PAPPA2   | 1.369824 | 0.001278 | pappalysin 2                              |
| COMP     | 1.203057 | 0.000349 | cartilage oligomeric matrix protein       |
| MRAS     | 1.190434 | 0.000203 | muscle RAS oncogene homolog               |
| ANTXR1   | 1.142667 | 0.000533 | anthrax toxin receptor 1                  |
| SNORA70  | 1.128091 | 0.001007 | small nucleolar RNA, H/ACA box 70         |
| COL8A1   | 1.11093  | 0.001962 | collagen, type VIII, alpha 1              |
| BGN      | 1.107134 | 0.000473 | biglycan                                  |
| PDLIM3   | 1.084033 | 0.000701 | PDZ and LIM domain 3                      |
| TSNAX    | 1.081397 | 0.000861 | translin-associated factor X              |
| KIAA1199 | 1.066886 | 6.02E-05 | KIAA1199                                  |
| PALLD    | 1.02927  | 0.000918 | palladin, cytoskeletal associated protein |
| COL1A1   | 1.005134 | 0.001674 | collagen, type I, alpha 1                 |

|           |          |          |                                                                                   |
|-----------|----------|----------|-----------------------------------------------------------------------------------|
| UCK2      | 1.000584 | 0.00031  | uridine-cytidine kinase 2                                                         |
| DPP4      | -3.8413  | 0.000506 | dipeptidyl-peptidase 4                                                            |
| CHI3L1    | -3.64973 | 0.000116 | chitinase 3-like 1 (cartilage glycoprotein-39)                                    |
| ABI3BP    | -3.45556 | 2.59E-05 | ABI family, member 3 (NESH) binding protein                                       |
| CD36      | -3.17878 | 0.001115 | CD36 molecule (thrombospondin receptor)                                           |
| MME       | -3.12409 | 3.73E-05 | membrane metallo-endopeptidase                                                    |
| ABCA9     | -2.98074 | 2.32E-07 | ATP-binding cassette, sub-family A (ABC1), member 9                               |
| ASPN      | -2.91795 | 0.000167 | asporin                                                                           |
| FABP3     | -2.73031 | 8.75E-05 | fatty acid binding protein 3, muscle and heart (mammary-derived growth inhibitor) |
| USP53     | -2.59178 | 0.000156 | ubiquitin specific peptidase 53                                                   |
| PRG4      | -2.55087 | 0.000712 | proteoglycan 4                                                                    |
| KIAA1324L | -2.48533 | 0.000125 | KIAA1324-like                                                                     |
| H19       | -2.48121 | 6.98E-06 | H19, imprinted maternally expressed transcript (non-protein coding)               |
| OLFML1    | -2.42899 | 6.87E-06 | olfactomedin-like 1                                                               |
| COL14A1   | -2.28444 | 8.97E-05 | collagen, type XIV, alpha 1                                                       |
| DEPDC6    | -2.26407 | 0.000138 | DEP domain containing 6                                                           |
| CLEC2B    | -2.25898 | 2.14E-06 | C-type lectin domain family 2, member B                                           |

|         |          |          |                                                            |
|---------|----------|----------|------------------------------------------------------------|
| ITGB8   | -2.11175 | 0.000523 | integrin, beta 8                                           |
| NFIA    | -2.04056 | 8.87E-05 | nuclear factor I/A                                         |
| IFT80   | -2.03646 | 0.000832 | intraflagellar transport 80 homolog (Chlamydomonas)        |
| DCLK1   | -2.03198 | 2.13E-05 | doublecortin-like kinase 1                                 |
| PCDH18  | -2.02456 | 0.000935 | protocadherin 18                                           |
| KCNK2   | -1.96443 | 0.000856 | potassium channel, subfamily K, member 2                   |
| EBF2    | -1.95366 | 1.46E-06 | early B-cell factor 2                                      |
| AHNAK2  | -1.9387  | 0.0005   | AHNAK nucleoprotein 2                                      |
| PLIN2   | -1.93471 | 0.000484 | perilipin 2                                                |
| EVI2B   | -1.89637 | 0.001493 | ecotropic viral integration site 2B                        |
| EDNRB   | -1.87448 | 6.69E-05 | endothelin receptor type B                                 |
| LPAR1   | -1.86136 | 5.53E-05 | lysophosphatidic acid receptor 1                           |
| EFEMP1  | -1.86048 | 0.000674 | EGF-containing fibulin-like extracellular matrix protein 1 |
| STRBP   | -1.71553 | 0.001013 | spermatid perinuclear RNA binding protein                  |
| HLA-DMA | -1.7072  | 0.00117  | major histocompatibility complex, class II, DM alpha       |
| PDGFRL  | -1.69995 | 0.001927 | platelet-derived growth factor receptor-like               |
| LAMA4   | -1.62257 | 0.000905 | laminin, alpha 4                                           |

|           |          |          |                                                                     |
|-----------|----------|----------|---------------------------------------------------------------------|
| OR5I1     | -1.61237 | 0.001527 | olfactory receptor, family 5, subfamily I, member 1                 |
| SLC43A3   | -1.60662 | 0.000124 | solute carrier family 43, member 3                                  |
| CREB5     | -1.51225 | 0.00031  | cAMP responsive element binding protein 5                           |
| GEM       | -1.50438 | 0.000747 | GTP binding protein overexpressed in skeletal muscle                |
| C14orf43  | -1.49981 | 0.000791 | chromosome 14 open reading frame 43                                 |
| IRAK3     | -1.47566 | 0.001532 | interleukin-1 receptor-associated kinase 3                          |
| OGN       | -1.4656  | 5.31E-06 | osteoglycin                                                         |
| MIRLET7A2 | -1.35017 | 4.41E-07 | microRNA let-7a-2                                                   |
| AIM1      | -1.32869 | 0.000301 | absent in melanoma 1                                                |
| SPARCL1   | -1.32237 | 5.27E-05 | SPARC-like 1 (hevin)                                                |
| RFX8      | -1.31985 | 0.000103 | regulatory factor X, 8                                              |
| TTC19     | -1.30115 | 0.001601 | tetratricopeptide repeat domain 19                                  |
| HMG20A    | -1.2917  | 0.001041 | high-mobility group 20A                                             |
| DDB1      | -1.28993 | 0.000961 | damage-specific DNA binding protein 1, 127kDa                       |
| KHDRBS3   | -1.23053 | 0.001647 | KH domain containing, RNA binding, signal transduction associated 3 |
| FDFT1     | -1.18182 | 0.00035  | farnesyl-diphosphate farnesyltransferase 1                          |
| RND3      | -1.1498  | 0.000939 | Rho family GTPase 3                                                 |

|         |          |          |                                                                                     |
|---------|----------|----------|-------------------------------------------------------------------------------------|
| OSBPL1A | -1.13985 | 0.001997 | oxysterol binding protein-like 1A                                                   |
| ADSL    | -1.09503 | 0.000132 | adenylosuccinate lyase                                                              |
| USP24   | -1.06974 | 0.000333 | ubiquitin specific peptidase 24                                                     |
| NFKBIA  | -1.02545 | 0.0015   | nuclear factor of kappa light polypeptide gene enhancer in B-cells inhibitor, alpha |
| SNX9    | -1.02365 | 2.96E-05 | sorting nexin 9                                                                     |
| PDE1A   | -1.00186 | 8.62E-07 | phosphodiesterase 1A, calmodulin-dependent                                          |
